# Supplementary material
Source: HighWire-hosted journal article supplement (https://jcs.biologists.org/content/suppl/2012/03/04/125.3.763)

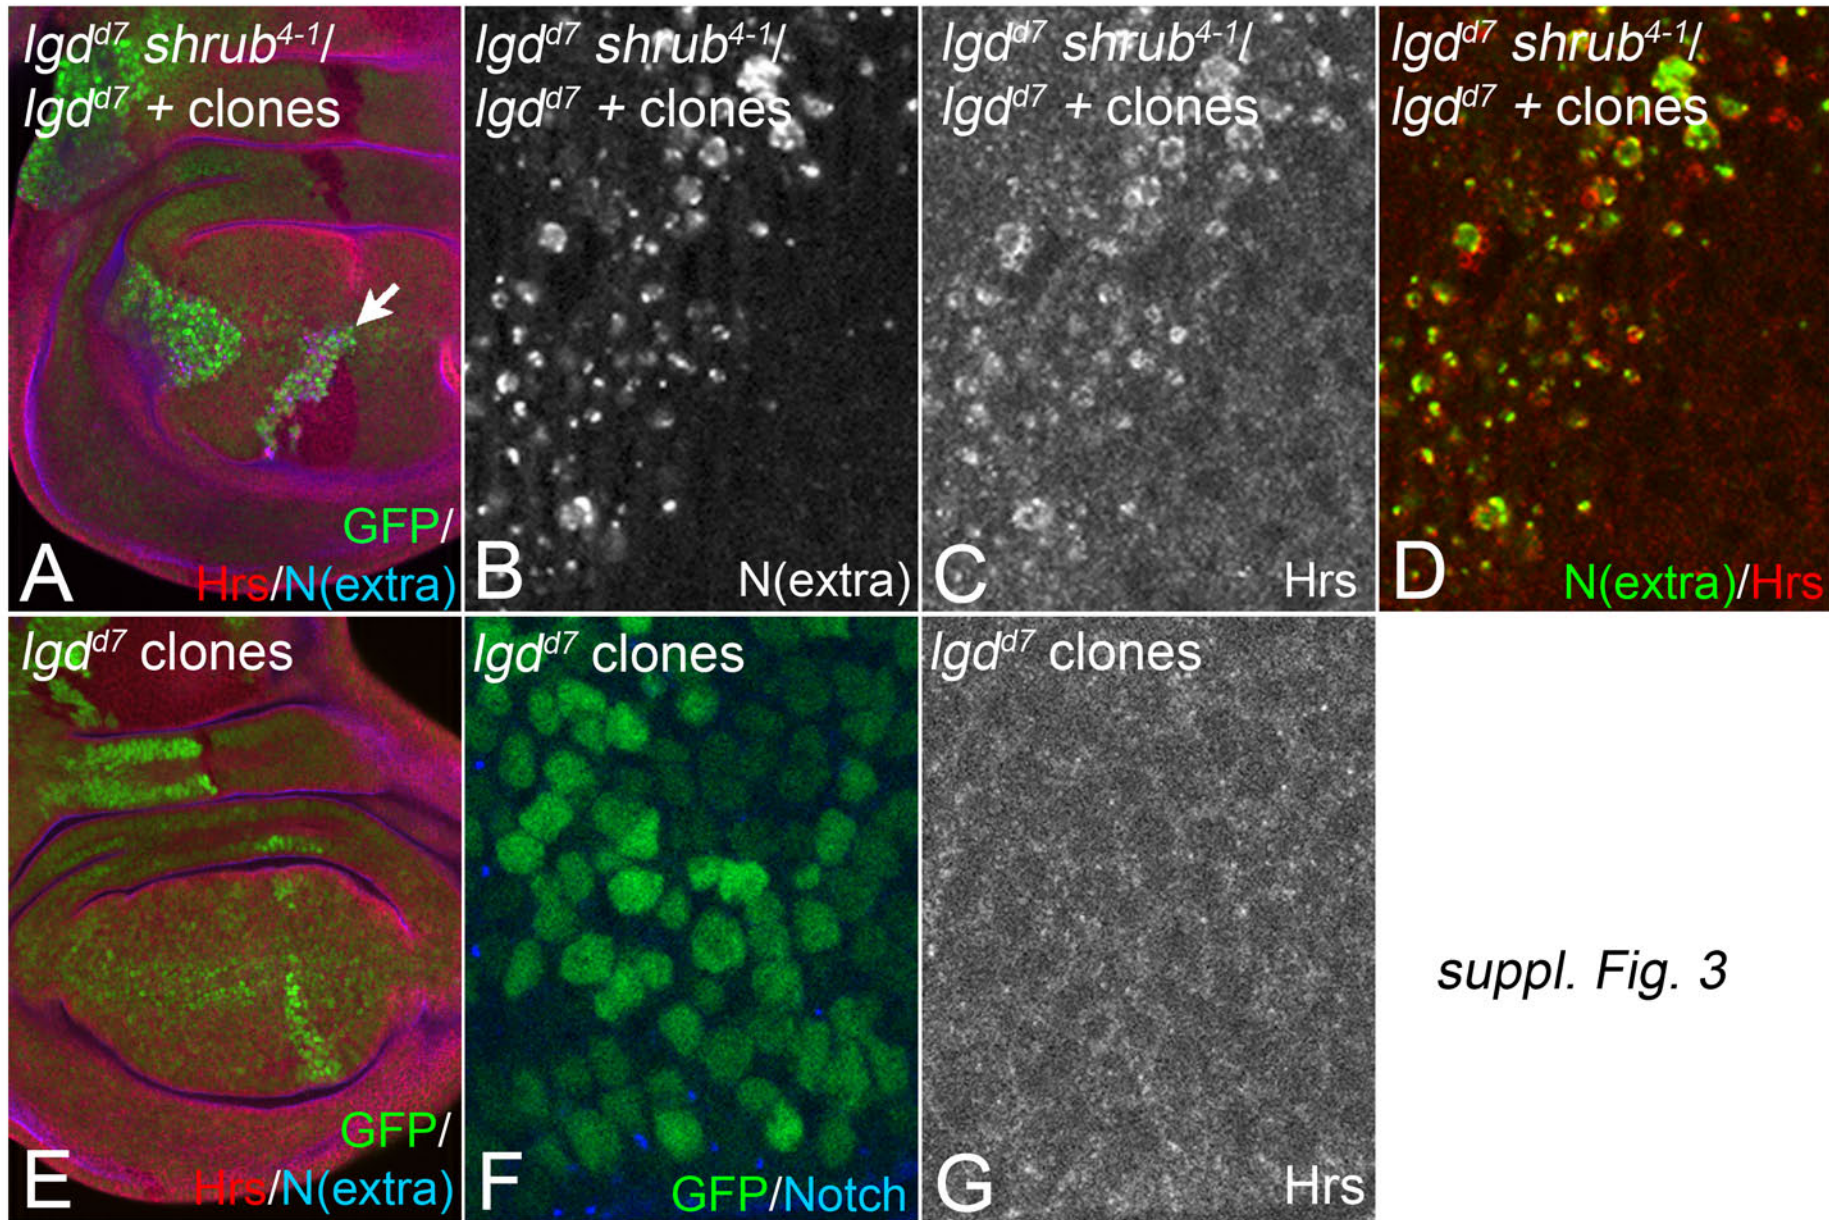

suppl. Fig. 3

Supplement: JCS097261FigS3.pdf [file JCS097261FigS3.pdf]
